# Supplementary material
Source: Elsevier journal article supplement (https://www.sciencedirect.com/science/article/pii/S0375090622000787)
Supplement: mmc1 [file S0375090622000787:mmc1.doc]

| **Tabla suplementaria S1** Resumen de los resultados de la lambda de Wilks para el análisis de las abundancias relativas a nivel de filo. | | |
| --- | --- | --- |
| **Taxones incluidos** | **E=sujeto (tratamiento)** | **E=sujeto** |
| Los seis filos* más abundantes en conjunto | 0.3201 | 0.4388 |
| Los cinco más abundantes | 0.2183 | 0.2852 |
| Los cuatro más abundantes | 0.3090 | 0.4157 |
| Los tres más abundantes | 0.4082 | 0.4654 |
| Los dos más abundantes | 0.3907 | 0.3847 |
|  |  |  |
| Firmicutes y Cianobacteria | 0.2502 | 0.2614 |
| Firmicutes y Proteobacteria | 0.1902 | 0.2999 |
| Firmicutes y Actinobacteria | 0.3030 | 0.4074 |
| Firmicutes y Verrucomicrobia | 0.3395 | 0.3538 |
| Bacteroidetes y Cianobacteria | 0.5613 | 0.5304 |
| Bacteroidetes y Proteobacteria | 0.1606 | 0.2438 |
| Bacteroidetes y Actinobacteria | 0.5225 | 0.5276 |
| Bacteroidetes y Verrucomicrobia | 0.3642 | 0.3400 |
|  |  |  |
| Firmicutes, Bacteroidetes, y Proteobacteria | 0.3025 | 0.4271 |
| Bacteroidetes, Proteobacteria, y Actinobacteria | 0.3006 | 0.4417 |
| Bacteroidetes, Proteobacteria, y Verrucomicrobia | 0.1513 | 0.2569 |
| **Firmicutes, Proteobacteria, y Verrucomicrobia** | **0.1139** | **0.2007** |
|  |  |  |
| Firmicutes, Bacteroidetes, Proteobacteria, y Verrucomicrobia | 0.1511 | 0.2779 |
| * Firmicutes, Bacteroidetes, Cianobacteria, Proteobacteria, Actinobacteria, Verrucomicrobia. El orden de las variables dependientes (p.ej., la abundancia relativa de Firmicutes, Bacteroidetes, etc.) en la declaración SAS no afectó los resultados. El uso de la declaración “sujeto repetido” o “sujeto aleatorio” o “sujeto aleatorio*tratamiento”, antes o después de la declaración manova, tampoco afectó los resultados. Ejemplo de código SAS: *proc glm data=yourdata; class treatment subject; model Dependent 1, Dependent 2…Dependent n= treatment subject; manova h=_all_ E=subject; run.* La combinación de 3 filos (Firmicutes, Proteobacteria y Verrucomicrobia) fue asociada con el valor más bajo y está destacado con negritas para una mejor visualización. | | |

| **Tabla suplementaria S2** Resultados de correlación entre los periodos de línea de base y final para cada filo. | | | |
| --- | --- | --- | --- |
| **Taxón** | **R** | **R2** | ***Valor de P*** |
| Actinobacteria | 0.709 | 0.504 | 0.007* |
| Proteobacteria | 0.561 | 0.315 | 0.046 |
| Cianobacteria | 0.289 | 0.084 | 0.338 |
| Bacteroidetes | -0.181 | 0.033 | 0.555 |
| Firmicutes | 0.063 | 0.004 | 0.838 |
| Verrucomicrobia | -0.000 | 3x10-8 | 0.999 |
| Los resultados están organizados por valores de p de menor a mayor. *Una sola muestra (ID de sujeto: S02) fue responsable de esta relación positiva aparentemente significativa. | | | |

| **Tabla suplementaria S3** Resultados de correlación entre diferentes combinaciones de los puntos temporales para cada filo. | | | |
| --- | --- | --- | --- |
| **Puntos temporales y taxones** | **R** | **R2** | **Valor de *P*** |
| LB Cianobacteria*LB Proteobacteria | 0.903 | 0.815 | 2.4x10-5 |
| LB Firmicutes* LB Proteobacteria | -0.856 | 0.733 | 0.0002 |
| LB Firmicutes*LB Cianobacteria | -0.665 | 0.442 | 0.013 |
| LB Cianobacteria*Final Proteobacteria | 0.634 | 0.402 | 0.019 |
| LB Firmicutes*LB Actinobacteria | -0.548 | 0.300 | 0.052 |
| LB Bacteroidetes*LB Verrucomicrobia | -0.459 | 0.211 | 0.114 |
| LB Firmicutes*Final Proteobacteria | -0.404 | 0.163 | 0.170 |
| LB Proteobacteria*LB Actinobacteria | 0.365 | 0.133 | 0.219 |
| LB Firmicutes*LB Verrucomicrobia | 0.328 | 0.107 | 0.273 |
| Final Firmicutes*LB Proteobacteria | -0.299 | 0.089 | 0.319 |
| LB Bacteroidetes*LB Actinobacteria | -0.261 | 0.068 | 0.389 |
| LB Firmicutes*LB Bacteroidetes | -0.253 | 0.064 | 0.404 |
| LB Bacteroidetes*LB Cianobacteria | -0.245 | 0.059 | 0.419 |
| LB Actinobacteria*LB Verrucomicrobia | -0.140 | 0.019 | 0.646 |
| LB Bacteroidetes*LB Proteobacteria | -0.119 | 0.014 | 0.696 |
| LB Cianobacteria*LB Actinobacteria | 0.108 | 0.012 | 0.726 |
| LB Cianobacteria*LB Verrucomicrobia | -0.066 | 0.004 | 0.829 |
| Final Cianobacteria*LB Proteobacteria | -0.047 | 0.002 | 0.878 |
| LB Proteobacteria*LB Verrucomicrobia | -0.040 | 0.001 | 0.896 |
| Los resultados están organizados por valores de p de menor a mayor. LB: Línea de base. | | | |

| **Tabla suplementaria S4** Resultados de correlación entre los diferentes taxones y el número total identificado de VSA. | | | |
| --- | --- | --- | --- |
| **Taxón** | **R** | **R2** | **Valor de *P*** |
| *Oscillospira* | 0.744 | 0.553 | 0.0000 |
| *Alistipes* | 0.684 | 0.468 | 0.0001 |
| *Holdemanella* | 0.652 | 0.425 | 0.0002 |
| *Fusicatenibacter* | 0.649 | 0.421 | 0.0002 |
| *Coprococcus* | 0.619 | 0.383 | 0.0006 |
| *Lachnobacterium* | 0.617 | 0.381 | 0.0006 |
| *Lachnoclostridium* | 0.584 | 0.341 | 0.0014 |
| *Dialister* | 0.582 | 0.339 | 0.0014 |
| *Bifidobacterium* | 0.573 | 0.328 | 0.0018 |
| *Collinsella* | 0.561 | 0.315 | 0.0023 |
| *Paludibacter* | 0.556 | 0.309 | 0.0026 |
| *Dorea* | 0.539 | 0.291 | 0.0037 |
| *Lactobacillus* | 0.531 | 0.282 | 0.0044 |
| *Tyzzerella* | 0.521 | 0.271 | 0.0053 |
| *Eucalyptus* | -0.520 | 0.270 | 0.0053 |
| *Halospirulina* | -0.515 | 0.265 | 0.0060 |
| *Eubacterium* | 0.518 | 0.268 | 0.0057 |
| *Adlercreutzia* | 0.491 | 0.241 | 0.0093 |
| *Shigella* | 0.487 | 0.237 | 0.0101 |
| *Enterococcus* | 0.475 | 0.226 | 0.0123 |
| *Staphylococcus* | 0.466 | 0.217 | 0.0143 |
| *Roseburia* | 0.459 | 0.211 | 0.0162 |
| *Faecalibacterium* | 0.444 | 0.197 | 0.0202 |
| *Enterobacter* | 0.427 | 0.182 | 0.0263 |
| *Marchantia* | -0.421 | 0.177 | 0.0286 |
| *Subdoligranulum* | 0.418 | 0.175 | 0.0302 |
| *LBautia* | 0.408 | 0.166 | 0.0344 |
| *Ruminiclostridium* | 0.385 | 0.148 | 0.0472 |
| Los resultados están organizados por valores de p de menor a mayor. VSA: variantes de secuencia de amplicones | | | |
